# Supplementary material for: Origin and evolution of the Variscan Léon eclogites: insights from zircon and garnet petrochronology
Source: Copernicus journal article supplement (doi:10.5194/ejm-37-639-2025), 2025-10-01
Supplement: Supplementary file 1 [file ejm-37-639-2025-supplement.zip]

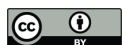

*Supplement of*

## **Origin and evolution of the Variscan Léon eclogites: insights from zircon and garnet petrochronology**

**Lorraine Tual et al.**

*Correspondence to:* Lorraine Tual ([lorraine.tual@univ-brest.fr](mailto:lorraine.tual@univ-brest.fr))

- [ejm-37-639-2025-supplement-title-page.pdf](#)
- [table S1 S2 S3 S4 S5\\_R1\\_F 2.xlsx](#)

The copyright of individual parts of the supplement might differ from the article licence.
