# Supplementary material for: Origin and evolution of the Variscan Léon eclogites: insights from zircon and garnet petrochronology
Source: Copernicus journal article supplement (doi:10.5194/ejm-37-639-2025), 2025-10-01
Supplement: Supplementary file 1 [file ejm-37-639-2025-supplement.zip]

## Sheet: S1 U-Pb zircon eclogite
								not corrected for Pbc for Terra-Wasserburg					corrected for Pbc for Concordia Wetherhill
Analysis	Textural context	Pb ppm	U ppm	Th ppm	Th/U	Pbc %		238U/206Pb	± (1σ)	207Pb/206Pb	± (1σ)		207Pb/235U	± (1σ, absolute)	206Pb/238U	± (1σ, absolute)	Error correlation		Age 206Pb/238U	±	Age 207Pb/235U	±	Age 207Pb/206Pb	±		Concordance	excluded data	concordia age
eclo5a2-5@1	CL-medium bright core, no micro-inclusions	1.49173	28.2882	7.14323	0.252517	0		16.3538	0.0455382	0.0622767	0.00310447		0.552688	0.0274159	0.061376	0.000884101	0.290389		383.988	5.36747	446.756	17.7722	784.313	96.6928		85.9503	discordant
eclo5a2-5@2	CL-dark core, no micro-inclusions	2.83271	52.8284	8.97026	0.1698	0.00520232		15.9389	0.0765542	0.058065	0.00169481		0.463503	0.0166367	0.0624088	0.000885637	0.395362		390.258	5.37157	386.691	11.4775	365.402	72.657		100.922		x
eclo5a2-4@1	CL-dark core, micro-inclusions	1.72004	28.0655	6.38826	0.22762	0.0187924		13.7539	0.437133	0.0560774	0.00176926		0.399382	0.0286842	0.0713309	0.00297562	0.580825		444.169	17.8801	341.2	20.6027	0	0		130.179	discordant
eclo5a2-4@2	CL-dark core, micro-inclusions	2.906	53.3372	20.278	0.380185	0.00828755		15.6216	0.0710046	0.0979987	0.00728932		0.79445	0.0671232	0.0634127	0.00125942	0.235066		396.347	7.63012	593.693	37.2883	1443.74	148.865		66.7595	discordant
eclo5a2-16@2	CL-bright rim	2.65164	43.6107	7.03835	0.161391	0.0129969		13.924	0.335927	0.0953169	0.0195788		0.820008	0.213151	0.0707675	0.0074623	0.405666		440.778	44.77	608.053	112.454	1293.46	403.344		72.4901	discordant
eclo5aD-2@2	CL-bright rim	0.20289	3.98467	0.0938704	0.0235579	0.016639		16.4783	0.137187	0.227523	0.00963038		1.73666	0.0877503	0.0592625	0.00135269	0.451736		371.139	8.22691	1022.22	32.0469	2924.98	71.1174		36.307	discordant
eclo5aD-2@3	CL-bright rim	2.22979	30.5141	0.0883759	0.00289623	0.0113591		11.5359	0.0528456	0.374238	0.0122314		4.28325	0.24728	0.0850503	0.00247203	0.503456		526.197	14.6699	1690.15	46.4459	3771.85	73.6608		31.1332	discordant
eclo5aD-2@4	CL-dark core, micro-inclusions	2.51893	47.3818	48.5965	1.02564	0.00223914		16.1161	0.127731	0.150328	0.0206184		1.26668	0.178295	0.0618752	0.00133164	0.152897		387.02	8.07901	830.906	76.8833	2328.42	220.599		46.578	discordant
eclo5aD-8@2	CL-dark core, micro-inclusions	2.05309	40.7673	49.2573	1.20825	0.00512592		16.9707	0.0468738	0.0620237	0.00355355		0.467571	0.0292531	0.0586148	0.00063861	0.174142		367.196	3.88763	389.51	20.0406	524.264	129.679		94.2713	discordant
eclo5aD-2@1	CL-medium bright core, no micro-inclusions	1.82804	34.3648	25.6452	0.746265	0.00725369		16.0154	0.0838877	0.109852	0.0151798		0.884136	0.131392	0.0619133	0.00125565	0.136469		387.251	7.61799	643.214	68.4486	1689.06	249.459		60.2056	discordant
eclo5a3D-7@1	CL-dark core, micro-inclusions	15.4851	286.467	143.405	0.500599	0.000911524		15.8801	0.0482085	0.0540563	0.000274467		0.463004	0.00622316	0.0629145	0.000774853	0.91631		393.326	4.69765	386.345	4.30996	344.743	12.1139		101.807		x
eclo5a3d-6@2	CL-dark core, micro-inclusions	3.91567	65.0595	20.6205	0.316948	0.00285103		14.2219	0.145656	0.180478	0.0201473		1.72008	0.208193	0.0700497	0.00288582	0.340366		436.455	17.362	1016.05	74.886	2635.17	177.574		42.9559	discordant
eclo5a3d-14@1	CL-dark core,no micro-inclusions	8.30849	157.38	345.102	2.19279	0.00381213		16.2129	0.0403287	0.0538158	0.000496986		0.430245	0.00494157	0.0614445	0.000256177	0.363002		384.404	1.55564	363.351	3.50215	231.064	24.5268		105.794		x
eclo5a3d-5@1	CL-dark core, micro-inclusions	0.11784	2.69936	0.0450768	0.0166991	0.0179986		19.3167	0.0875839	0.0625974	0.00518167		0.333366	0.0601141	0.0508095	0.00164575	0.179624		319.489	10.0883	292.132	44.7761	78.7114	374.721		109.365	discordant
eclo5aC-12@1	CL-bright rim	2.50448	46.086	43.4905	0.943682	0.0038103		15.7471	0.043017	0.0686443	0.00183101		0.571503	0.0176622	0.0632501	0.000575619	0.294475		395.361	3.48899	458.986	11.3483	791.473	60.7743		86.1379	discordant
eclo5aC-12@2	CL-dark core, micro-inclusions	4.90773	85.1178	142.325	1.6721	0.000791088		14.8894	0.147443	0.0608808	0.00206391		0.557881	0.0255256	0.0671077	0.00200688	0.653604		418.707	12.1122	450.146	16.5021	614.111	73.0845		93.0157	mixed with inclusions (low counts on Zr)
eclo5aC-12@3	CL-dark core, micro-inclusions	5.0252	90.9491	127.29	1.39957	0.00531182		15.462	0.075593	0.0743718	0.00872461		0.620344	0.0788717	0.0643082	0.0010989	0.134401		401.773	6.6525	490.063	48.2594	927.247	239.283		81.984	discordant
eclo5aB-9@2	CL-bright rim	23.5663	441.682	1350.6	3.05785	0.000409429		16.0962	0.06814	0.0629194	0.0028157		0.536396	0.0249236	0.0621004	0.000708579	0.245566		388.387	4.29929	436.045	16.3395	696.215	93.1677		89.0702	discordant
eclo5aB-9@3	CL-bright rim	1.16306	24.9639	0.473278	0.0189585	0.0202975		18.0571	0.117278	0.061954	0.00460159		0.336432	0.0393085	0.0542253	0.00189569	0.29921		340.411	11.5814	294.464	29.4347	0	195.675		115.603	discordant
eclo5A2-6@1	CL-bright rim	0.353859	6.53896	0.0894918	0.0136859	0.0255652		15.2723	0.111697	0.271357	0.00882706		2.1562	0.0922438	0.0629845	0.00098878	0.366959		393.75	5.99362	1167.05	29.2505	3173.87	61.6846		33.739	discordant
eclo5A2-6@2	CL-dark core, micro-inclusions	9.4393	180.737	106.793	0.590877	0.00349047		16.3922	0.0435537	0.0618141	0.00304175		0.494498	0.0262995	0.0607861	0.000656433	0.20305		380.405	3.98792	407.971	17.7129	567.13	109.508		93.243	discordant	on fig. 8f, not included in calculation
eclo5A2-6@3	CL-bright rim	1.72151	34.0516	21.2769	0.624843	0.031176		16.4306	0.248157	0.0737262	0.00997148		0.379382	0.086555	0.0588415	0.00258065	0.192234		368.576	15.6924	326.583	61.7952	37.0654	463.395		112.858	discordant
eclo5A2-9@1	CL-dark core, micro-inclusions	7.59787	145.413	86.2184	0.592922	0.00380731		16.3809	0.0393078	0.0548281	0.000540956		0.434294	0.00708153	0.0608137	0.000728238	0.734392		380.572	4.42388	366.221	5.00091	276.333	25.1473		103.919		x
eclo5A2-19@1	CL-bright rim	0.861632	11.1978	0.0509268	0.00454794	0.0156879		10.8743	0.30129	0.37793	0.041471		4.51144	0.649945	0.0895575	0.00732139	0.567454		552.919	43.1724	1733.08	113.191	3772.26	169.111		31.9038	discordant
eclo5A2-1@2	CL-dark core, micro-inclusions	28.8629	547.38	438.073	0.800309	0.000748335		16.2821	0.0524851	0.0567683	0.000583428		0.475699	0.00580059	0.0613709	0.000382796	0.511522		383.957	2.32456	395.118	3.98339	460.933	23.0797		97.1755		x
eclo5A2-1@3	CL-dark core, micro-inclusions	28.63	537.477	421.047	0.783376	0.000459939		16.1223	0.0375381	0.0562178	0.000429452		0.477852	0.00429463	0.0619973	0.000280903	0.504141		387.761	1.70488	396.598	2.94642	448.436	17.1522		97.7717		x
eclo5A2-3@1	CL-dark core, micro-inclusions	6.19181	110.938	0.324571	0.00292569	0.00416632		15.312	0.616036	0.160782	0.010503		1.40794	0.131044	0.0649603	0.00416995	0.689686		405.722	25.1923	892.29	53.8074	2425.69	110.001		45.4697	discordant
eclo5A2-3@3	CL-dark outer core ! low Zr count	30.7109	621.472	744.189	1.19746	0.00101739		17.369	0.0570494	0.0551895	0.000462238		0.431568	0.00487141	0.0575151	0.000421305	0.648947		360.496	2.56768	364.289	3.44933	388.509	19.1597		98.9586	mixed with inclusions (low counts on Zr)
eclo5A2-3@4	mix bright rim and CL-dark outer core	7.95541	161.679	209.39	1.2951	0.00186235		17.4287	0.069125	0.0555946	0.000684169		0.427501	0.0061201	0.0572693	0.000355903	0.434099		358.997	2.16966	361.401	4.34393	376.857	28.7564		99.3349
eclo5A2-11@1	CL-dark core, micro-inclusions	20.1377	389.114	289.632	0.744338	0.00125313		16.5806	0.0697631	0.0590397	0.0013571		0.482321	0.0118063	0.0602345	0.000412873	0.280024		377.052	2.50986	399.664	8.0552	532.578	50.6596		94.3422	discordant	on fig. 8f, not included in calculation
eclo5A3A-13@1	CL-dark core, micro-inclusions	22.7861	444.073	187.61	0.422476	0.00116716		16.7249	0.0592351	0.0560617	0.00041379		0.454292	0.00513647	0.0597209	0.00049497	0.733033		373.928	3.01026	380.281	3.57995	419.142	17.0846		98.3295		on fig. 8f, not included in calculation
eclo5A3A-3@1	CL-dark core, micro-inclusions	13.6711	254.38	139.635	0.548924	0.0021661		15.9524	0.116007	0.0549989	0.000404147		0.459674	0.010763	0.0625505	0.00137819	0.941005		391.118	8.35594	384.031	7.45956	341.54	17.838		101.845		x
eclo5A3A-3@2	CL-dark core, micro-inclusions	13.4101	253.54	184.016	0.725785	0.00115433		16.2256	0.0680943	0.0549294	0.000345857		0.458769	0.00363607	0.0615597	0.000265784	0.544747		385.104	1.61379	383.402	2.52776	373.137	14.8957		100.444		x
eclo5A3A-17@2	CL-dark outer core mix with bright rim?	11.4487	235.115	55.547	0.236255	0.00367828		17.5792	0.053362	0.0564596	0.000541157		0.418228	0.00550462	0.0566746	0.00045865	0.614865		355.37	2.79746	354.783	3.93341	350.946	23.2879		100.165
eclo5A2-2@1	CL-bright core, no micro-inclusions	1.86468	30.1074	8.14364	0.270486	0.00759528		13.7171	0.396722	0.263506	0.0732199		2.55431	0.777552	0.0720846	0.00689838	0.314376		448.703	41.3469	1287.67	200.88	3228.4	394.542		34.8461	discordant
eclo5A2-2@2	CL-bright core, no micro-inclusions	3.51638	63.97	22.8644	0.357424	0.00147513		15.6063	0.05175	0.0670556	0.00125847		0.581306	0.0117851	0.0639782	0.000282398	0.217722		399.774	1.71076	465.3	7.53934	803.132	40.8991		85.9173	discordant
eclo5A2-2@3	CL-bright rim	1.34818	25.2586	7.67906	0.304018	0.0223483		15.6984	0.102937	0.0888075	0.00708013		0.593417	0.0653956	0.0621229	0.00175224	0.255949		388.523	10.6262	473.047	40.84	907.08	205.285		82.132	discordant
eclo5A2-2@4	CL-bright core, no micro-inclusions	1.26203	23.4596	7.92549	0.337836	0.0279585		15.4562	0.064926	0.106014	0.0044606		0.698898	0.0436434	0.0626125	0.000906737	0.231908		391.494	5.49844	538.133	25.755	1220.39	114.96		72.7504	discordant
eclo5aC-11@3	CL-dark core, micro-inclusions	1.23787	18.3721	3.73926	0.203529	0.00677643		12.6256	0.217893	0.255164	0.0313679		2.69626	0.387515	0.0784201	0.00509917	0.452424		486.685	30.4092	1327.43	101.234	3180.73	189.57		36.6637	discordant
eclo5a2-14@2	CL-bright rim	0.757842	15.071	2.5323	0.168024	0.0280873		16.5758	0.0988972	0.0734677	0.00360043		0.397626	0.0378833	0.0585258	0.00107734	0.193211		366.654	6.55765	339.925	27.156	160.93	205.15		107.863	discordant
eclo5A2-12@1	CL-bright rim	3.1	64	15.8	0.246875	0		17.9749	0.0850097	0.0551421	0.000791118		0.423402	0.0102227	0.0556331	0.00108095	0.804744		349.013	6.59764	358.48	7.26631	420.219	31.6857		97.3591
4a1a-1@4	CL-bright core, no micro-inclusions	0.0772263	1.44684	0.0498796	0.0344748	0		18.1073	0.183361	0.0527936	0.00967247		1.22143	0.24127	0.0621235	0.00538266	0.438638		388.527	32.5868	810.429	104.693	2258.98	277.934		47.9409	discordant
eclo5a3d-6@1	CL-bright rim	0.34246	7.61413	0.529303	0.0695159	0.0435571		18.2443	0.11546	0.063336	0.00180598		0.186615	0.0251611	0.0523481	0.00133211	0.188735		328.922	8.15498	173.737	21.3052	0	0		189.322	high 206Pbc/206Pb
eclo5A2-3@5	CL-bright rim	1.28782	27.1915	15.2239	0.559879	0.0254056		17.6709	0.158325	0.0599425	0.00159511		0.293983	0.0170935	0.0551231	0.000561332	0.175136		345.898	3.42862	261.689	13.3254	0	0		132.179	high 206Pbc/206Pb
eclo5A3A-17@1	CL-bright rim	1.57897	33.4893	10.9152	0.325931	0.0338794		17.6056	0.076587	0.0542738	0.00132338		0.196917	0.0160135	0.0548755	0.000697064	0.156203		344.385	4.2584	182.514	13.4947	0	0		188.69	high 206Pbc/206Pb
eclo5A2-1@1	CL-bright rim	0.461259	4.17563	0.237488	0.0568747	0.047197		7.09244	0.152185	0.550003	0.0119333		9.22736	0.421927	0.128569	0.00424512	0.722097		779.694	24.2028	2360.83	41.0484	4300.41	45.6971		33.0262	high 206Pbc/206Pb
eclo5A2-9@2	CL-dark core, micro-inclusions	0.524333	11.4476	1.86696	0.163087	0.0574086		17.6379	0.175826	0.0659663	0.004013		0.11405	0.0401922	0.0533095	0.00233618	0.124353		334.808	14.282	109.663	35.9872	0	0		305.305	high 206Pbc/206Pb
eclo5aC-15@1	CL-dark core, micro-inclusions	0.785156	14.4205	0.153048	0.0106132	0.0407154		14.9448	0.123661	0.171446	0.0140306		1.16269	0.145891	0.0633705	0.00281813	0.354411		396.091	17.0616	783.217	66.2847	2138.84	191.969		50.5723	high 206Pbc/206Pb
eclo5a3d-5@2	CL-bright rim	0.113738	2.975	0.0572115	0.0192308	0.143411		19.1358	0.167916	0.064479	0.00507381		-0.456556	-0.0847474	0.0444969	0.00286704	0.347113		280.647	17.6705	-619.209	-172.146	0	0		-45.3234	high 206Pbc/206Pb
eclo5A2-3@2	CL-bright rim	0.108999	2.96509	0.283901	0.095748	0.214557		17.7498	0.147592	0.0935607	0.00661653		-0.881903	-0.142685	0.0427855	0.0040344	0.582807		270.076	24.8922	-2169.11	-	0	0		-12.451	high 206Pbc/206Pb
eclo5A2-8@1	CL-bright rim	0.236491	6.29463	0.270406	0.0429582	0.101153		20.466	0.0658923	0.0654335	0.00353648		-0.168366	-0.0298815	0.0437277	0.000905184	0.116636		275.898	5.5883	-187.199	-37.1554	0	0		-147.382	high 206Pbc/206Pb
eclo5A3A-13@2	CL-bright rim	0.121433	4.2999	0.0361935	0.00841729	0.385879		18.3064	0.124055	0.0634347	0.00270368		-2.10527	-0.198251	0.0328692	0.00299429	0.967382		208.481	18.6611	-	-	0	0		-	high 206Pbc/206Pb
eclo5A3A-13@3	CL-bright rim	0.123725	4.24113	0.030627	0.00722142	0.317125		19.5268	0.168698	0.0730065	0.0040785		-1.53328	-0.123968	0.0339538	0.00236345	0.860932		215.246	14.7186	-	-	0	0		-	high 206Pbc/206Pb
eclo5A3A-3@3	CL-bright core, no micro-inclusions	0.0607904	2.42405	0.224727	0.0927071	0.407688		18.7394	0.164307	0.0898574	0.00861134		-2.20894	-0.357014	0.029188	0.00459698	0.974463		185.465	28.7295	-	-	0	0		-	high 206Pbc/206Pb
eclo5A3A-3@4	CL-bright core, no micro-inclusions	0.0702896	2.51206	0.141568	0.0563556	0.199758		23.9324	0.098277	0.0873513	0.00725272		-0.590806	-0.115799	0.0325667	0.00283826	0.444649		206.592	17.6952	-907.312	-337.789	0	0		-22.7697	high 206Pbc/206Pb
eclo5A2-7@2	CL-bright core, no micro-inclusions	0.143969	4.3035	0.0506222	0.011763	0.252429		18.4916	0.129278	0.0891241	0.00556031		-1.13285	-0.108489	0.0389367	0.00279797	0.75036		246.239	17.3376	-	-	0	0		-	high 206Pbc/206Pb
eclo5A2-18@1	CL-bright core, no micro-inclusions	0.140205	3.81203	0.0476939	0.0125114	0.224375		16.9513	0.142788	0.135247	0.0047759		-0.820738	-0.134438	0.0428075	0.00225533	0.321642		270.212	13.9269	-1745.35	-1407.44	0	0		-15.4818	high 206Pbc/206Pb
eclo5A2-7@1	CL-bright core, no micro-inclusions	0.267719	6.24136	0.0702703	0.0112588	0.128133		16.9313	0.0875782	0.128525	0.00966226		-0.0374194	-0.0971378	0.0499243	0.00163078	0.0125832		314.057	10.005	-38.7242	-108.013	0	0		-811.009	high 206Pbc/206Pb
eclo4a2-2@1	CL-bright core, no micro-inclusions	0.0148605	0.380707	0.00129382	0.00339846	0.149058		17.6081	0.565245	0.192269	0.0338975		0.158009	0.464932	0.0454313	0.00864103	0.0646402		286.411	53.064	148.959	342.73	0	1610.84		192.275	high 206Pbc/206Pb
eclo4a1B-3@1	CL-dark core	0.0455767	0.792033	0.134296	0.169559	0.238679		8.89181	0.475114	0.40176	0.0391197		0.834513	0.963862	0.0669748	0.020401	0.26373		417.904	122.095	616.113	428.755	1433.34	1317.88		67.8291	high 206Pbc/206Pb
91500 zircon (1065 Ma, Wiedenbeck et al., 1995, 2004°
Analysis		Pb ppm	U ppm	Th ppm	Th/U	Pbc %		not corrected for Pbc for Terra-Wasserburg					corrected for Pbc for Concordia Wetherhill						Age 206Pb/238U	±	Age 207Pb/235U	±	Age 207Pb/206Pb	±
								238U/206Pb	± (1σ)	207Pb/206Pb	± (1σ)		207Pb/235U	± (1σ, absolute)	206Pb/238U	± (1σ, absolute)	Error correlation
91500@9		12.6708	82.461	29.1968	0.354068	0.00106795		5.59156	0.0410609	0.0757927	0.000667588		1.8487	0.0254146	0.178841	0.00131329	0.534168		1060.64	7.17767	1062.97	9.01855	1067.75	23.1867
91500@10		12.9704	83.8859	29.4641	0.35124	0.00118921		5.5568	0.0329075	0.0760167	0.00043871		1.8633	0.0178764	0.17996	0.00106572	0.617264		1066.75	5.81969	1068.16	6.31964	1071.02	15.0899
91500@11		12.2228	79.3811	27.9444	0.352028	0.000921406		5.58002	0.0262417	0.0761366	0.000476559		1.86406	0.019075	0.179211	0.000842794	0.45957		1062.66	4.60567	1068.43	6.74017	1080.21	18.1284
91500@12		13.2613	86.2695	30.6169	0.354898	0.00134398		5.58932	0.0247757	0.0772626	0.00076116		1.87997	0.0260578	0.178913	0.000793064	0.319801		1061.03	4.3351	1074.05	9.14582	1100.57	26.049
91500@13		13.1357	85.8075	30.403	0.354316	0.00122271		5.61255	0.0370934	0.0749323	0.000360605		1.81748	0.0172529	0.178172	0.00117754	0.696215		1056.98	6.43974	1051.78	6.19877	1040.99	13.6921
91500@14		12.5966	81.1008	28.668	0.353486	0.0015551		5.53171	0.0284924	0.0769159	0.000324815		1.8865	0.0167905	0.180776	0.000931129	0.57871		1071.21	5.08147	1076.35	5.88929	1086.77	14.4858
91500@15		12.558	80.4629	28.5277	0.354545	0.00033541		5.50509	0.0486378	0.0754904	0.000282243		1.88556	0.0189244	0.18165	0.00160489	0.880296		1075.98	8.74944	1076.02	6.63745	1076.1	9.53152
91500@16		12.0294	78.0117	27.2204	0.348927	0.000847112		5.57193	0.0412708	0.0744975	0.000589343		1.82775	0.0228803	0.179471	0.00132933	0.591688		1064.08	7.26137	1055.47	8.18276	1037.7	20.2435
91500@17		11.019	72.1553	24.3679	0.337714	0.000617644		5.62618	0.0311926	0.0755121	0.000559061		1.83971	0.0207503	0.177741	0.000985428	0.491545		1054.62	5.39153	1059.76	7.39262	1070.35	19.6132
91500@18		11.0416	72.5197	24.6602	0.340049	0.00106957		5.64303	0.0199771	0.076671	0.000403941		1.85326	0.0166613	0.17721	0.000627348	0.393774		1051.71	3.43445	1064.59	5.91199	1091.07	16.4665
91500@19		12.3077	79.8175	28.2269	0.353643	0		5.57196	0.0430678	0.0745558	0.000669825		1.85973	0.0249059	0.17947	0.00138719	0.577156		1064.08	7.57727	1066.89	8.80486	1072.64	21.8134
91500@20		12.9818	83.5363	29.6136	0.3545	0		5.52878	0.0304768	0.0747637	0.000371508		1.87728	0.0165761	0.180872	0.000997037	0.624292		1071.74	5.44056	1073.1	5.83286	1075.88	13.7886
91500@21		13.2812	86.1773	30.7895	0.35728	0.00074613		5.57498	0.0330816	0.0755378	0.000445428		1.85457	0.0176956	0.179373	0.00106439	0.6219		1063.55	5.81528	1065.06	6.27498	1068.14	14.9525
91500@22		12.2293	80.0895	28.3252	0.353669	0.000451743		5.62681	0.0259988	0.0748606	0.000315554		1.82694	0.0158346	0.177721	0.000821163	0.533102		1054.51	4.49318	1055.18	5.6716	1056.57	14.6954
91500@23		12.5605	81.5929	28.7196	0.351986	0.000512597		5.58129	0.0333814	0.0760017	0.000287172		1.86878	0.0164691	0.17917	0.00107161	0.678671		1062.44	5.85572	1070.1	5.81244	1085.74	12.9217
91500@29		13.5077	87.0778	30.9075	0.354941	0.000364139		5.53878	0.0337227	0.074387	0.000640275		1.84601	0.0215781	0.180545	0.00109924	0.52087		1069.95	5.99967	1062.01	7.66946	1045.72	19.9929
91500@30		12.8911	83.9527	29.677	0.353497	0.00122429		5.59542	0.0485441	0.0762111	0.000621734		1.8545	0.0268138	0.178718	0.0015505	0.600029		1059.96	8.4741	1065.03	9.49351	1075.42	23.0537
91500@31		12.2064	78.7106	27.6236	0.350952	0		5.5403	0.0545765	0.0740592	0.00072689		1.86452	0.0273985	0.180496	0.00177803	0.670369		1069.68	9.70212	1068.59	9.66575	1066.36	21.7686
91500@32		12.4262	80.6145	28.2777	0.350776	0.000794696		5.57396	0.0322564	0.0755305	0.000358076		1.85372	0.0164057	0.179406	0.00103822	0.653885		1063.73	5.67221	1064.76	5.82061	1066.84	13.4241
91500@33		12.3819	79.5692	27.8766	0.350344	0.000957683		5.52137	0.0393048	0.074653	0.000586061		1.84606	0.0228193	0.181114	0.00128929	0.575893		1073.06	7.03301	1062.03	8.10875	1039.42	20.2664
91500@34		12.8004	82.7914	29.3159	0.354093	0.00072767		5.55711	0.0344411	0.0751144	0.000600139		1.85042	0.0213165	0.17995	0.00111527	0.537999		1066.7	6.09017	1063.58	7.56517	1057.18	19.4293
91500@35		12.0343	78.2663	27.1264	0.346591	0.000609402		5.5878	0.0407445	0.0757273	0.000603682		1.85783	0.0236135	0.178961	0.00130493	0.573684		1061.3	7.13126	1066.21	8.3554	1076.29	20.7597
91500@36		12.1705	78.9311	27.6245	0.349982	0.00012415		5.57222	0.0433592	0.0752018	0.000926792		1.86009	0.0279274	0.179462	0.00139645	0.518269		1064.03	7.62784	1067.02	9.86664	1073.12	25.5776
91500@39		12.5062	81.1445	28.5413	0.351734	0		5.5747	0.0404307	0.0742145	0.000543824		1.83991	0.0204871	0.179382	0.00130097	0.651335		1063.6	7.1071	1059.83	7.29869	1052.07	16.9055
91500@40		12.9364	83.9021	29.6891	0.353854	0		5.57245	0.0482539	0.0751141	0.000500839		1.86613	0.0230114	0.179454	0.00155396	0.702239		1063.99	8.48772	1069.16	8.11969	1079.72	17.5156
91500@41		12.0625	78.8804	27.8462	0.353018	0		5.6185	0.0307974	0.0760869	0.000332177		1.87247	0.0169064	0.177983	0.000975601	0.607096		1055.95	5.33669	1071.41	5.95868	1103	14.284			Concordia Age = 1061.3 ±3.2 Ma (2σ, decay-const. errs included) MSWD (conc. + eq) = 1.8
91500@42		14.1036	92.7852	33.537	0.361447	0.000416644		5.65245	0.0370722	0.0760281	0.000484574		1.84786	0.020487	0.176914	0.00116031	0.591565		1050.1	6.35234	1062.67	7.27834	1088.57	17.8094
91500@43		14.0756	92.4035	33.3949	0.361403	0.000385215		5.64039	0.0314894	0.0747552	0.00041172		1.82133	0.0198597	0.177293	0.000989799	0.512002		1052.17	5.41749	1053.16	7.12237	1055.23	18.7483
91500@44		13.9221	91.296	33.0847	0.362389	0		5.63425	0.039311	0.0762177	0.000605313		1.86788	0.0230491	0.177486	0.00123835	0.565423		1053.23	6.77605	1069.78	8.128	1103.68	20.218

## Sheet: S2 O zircon
Analysis	Textural context	δ18O corrected from instrumental fractionation (‰)	± 2 SE
eclo5a3D-7@1	CL-dark core, micro-inclusions	4.12355	0.214291
eclo5a3d-6@2	CL-dark core, micro-inclusions	6.21934	0.200633
eclo5aC-12@2	CL-dark core, micro-inclusions	4.63794	0.187672
eclo5aC-12@3	CL-dark core, micro-inclusions	4.35635	0.227422
eclo5a2-16@1	CL-dark core, micro-inclusions	4.56463	0.325293
eclo5a3d-14@1	CL-dark core, micro-inclusions	6.05381	0.219333
eclo5a3d-5@1	CL-dark core, micro-inclusions	4.58434	0.233805
eclo5aC-11@3	CL-dark core, micro-inclusions	4.74076	0.198866
eclo5a2-17@1	CL-dark core, micro-inclusions	5.64797	0.273267
eclo5aC-15@1	CL-dark core, micro-inclusions	4.1092	0.203279
eclo5a2-5@2	CL-dark core, no micro-inclusions	3.23477	0.225311
eclo5a2-4@1	CL-dark core, no micro-inclusions	3.92956	0.233384
eclo5a2-4@2	CL-dark core, no micro-inclusions	4.26757	0.250242
eclo5aD-2@4	CL-dark core, no micro-inclusions	4.01049	0.210831
eclo5aD-8@2	CL-dark core, no micro-inclusions	2.88964	0.223463
eclo5A3A-3@1	CL-dark core, no micro-inclusions	4.30181	0.220446
eclo5A3A-3@2	CL-dark core, no micro-inclusions	5.05471	0.172926
eclo5a2-5@3	CL-dark core, no micro-inclusions	4.23084	0.239799
eclo5aD-2@1	CL-bright core, no micro-inclusions	4.93804	0.193343
eclo5aB-9@2	CL-bright rim	4.4828	0.202354
eclo5A3A-17@2	CL-bright rim	4.22698	0.256248
eclo5aC-11@1	CL-bright rim	5.54753	0.277024
eclo5a2-16@2	CL-bright rim	4.7167	0.299312
eclo5aD-2@2	CL-bright rim	3.4019	0.205434
eclo5aD-2@3	CL-bright rim	3.82674	0.237021
eclo5aD-8@1	CL-bright rim	3.10593	0.169234
eclo5A2-19@1	CL-bright rim	2.38705	0.219366
eclo5A2-8@1	CL-bright rim	4.86008	0.192418
eclo5a3d-5@2	CL-bright rim	4.51205	0.209897
eclo5aC-11@2	CL-bright rim	4.40957	0.236144
eclo5aC-12@1	CL-bright rim	5.61328	0.210897
eclo5aB-9@1	CL-bright rim	5.4427	0.315133
eclo5aB-9@3	CL-bright rim	5.29397	0.208854
eclo5A3A-3@3	CL-bright rim	3.76916	0.21149
eclo5A3A-3@4	CL-bright rim	3.76789	0.228964
eclo5A3A-17@1	CL-bright rim	4.05866	0.280749
eclo5a3A-13@2	CL-bright rim	4.71678	0.2834
eclo4a2-1@1	CL-medium-bright	4.64759	0.3384
eclo4a2-1@2	CL-bright	6.37261	0.248435
eclo4a1A-1@2	CL-dark-medium sectors	4.16058	0.218999
eclo4a1A-1@3	CL-bright core	4.34855	0.345925
eclo4a1B-2@1	dark-medium sectors	4.70822	0.24973

## Sheet: S3 REE zircon
91500	La	Ce	Pr	Nd	Sm	Eu	Gd	Tb	Dy	Ho	Er	Tm	Yb	Lu			La	Ce	Pr	Nd	Sm	Eu	Gd	Tb	Dy	Ho	Er	Tm	Yb	Lu
Iizuka, T., & Hirata, T. (2004). Simultaneous determinations of U-Pb age and REE abundances for zircons using ArF excimer laser ablation-ICPMS. Geochemical Journal, 38(3), 229-241.	0.031	2.77	0.022	0.324	0.624	0.31	2.719	1.11	14.2	5.83	28.2	8.44	101	13.9	Chondrite normalizing factors		0.237	0.613	0.0928	0.457	0.148	0.0563	0.199	0.0361	0.246	0.0546	0.16	0.0247	0.161	0.0246
error	0.038	0.41	0.021	0.085	0.246	0.112	0.658	0.25	2.5	0.9	4.6	1.27	16	2
Iizuka, T., & Hirata, T. (2004). Simultaneous determinations of U-Pb age and REE abundances for zircons using ArF excimer laser ablation-ICPMS. Geochemical Journal, 38(3), 229-241.															McDonough, W.F. and Sun, S.S. (1995) The Composition of the Earth. Chemical Geology, v. 120, p. 223-253.
	Sample (calibrated on 91500 zircon standard)																											Sample normalized to chondrite
Analysis	La (ppm)	±	Ce (ppm)	±	Pr (ppm)	±	Nd (ppm)	±	Sm (ppm)	± (1σ)	Eu (ppm)	± (1σ)	Gd (ppm)	± (1σ)	Dy (ppm)	± (1σ)	Ho (ppm)	± (1σ)	Er (ppm)	± (1σ)	Tm (ppm)	± (1σ)	Yb (ppm)	± (1σ)	Lu (ppm)	± (1σ)		La	Ce	Pr	Nd	Sm	Eu	Gd	Dy	Ho	Er	Tm	Yb	Lu
eclo5a3B-9@2	0.00835707	0.0012978	20.5835	3.2163	0.386238	0.048591	2.23596	0.357019	6.45881	0.785814	1.63036	0.146914	50.1724	5.42524	199.395	21.8274	75.0117	8.06787	316.306	33.0822	65.9698	6.99573	589.192	63.2504	89.2161	8.97996		0.0352619	33.5783	0.240267	4.8927	43.6406	28.9584	252.123	810.547	1373.84	1976.91	2670.84	3659.58	3626.67
eclo5a3B-9@1	0.0188173	0.00583898	0.095177	0.0040307	0.0169641	0.00537331	0.104611	0.020267	0.228866	0.0140787	0.362488	0.0374142	2.09183	0.145402	5.44219	0.411823	1.29127	0.0864685	4.11432	0.292684	0.623913	0.0432774	4.97978	0.19071	0.938275	0.0428705		0.0793979	0.155264	0	0.228908	1.54639	6.43851	10.5117	22.1227	23.6496	25.7145	25.2596	30.9303	38.1413
eclo5a3B-9@3	0.0981536	0.0106603	0.714356	0.113377	0.20069	0.0479249	15.2371	2.60792	0.577023	0.0318716	1.45798	0.173735	4.93552	0.369619	17.4031	1.42073	5.64167	0.508026	23.2992	2.26541	5.15718	0.458185	47.9569	4.03789	7.54238	0.763067		0.41415	1.16534	0	33.3416	3.8988	25.8966	24.8016	70.7444	103.327	145.62	208.793	297.869	306.601
eclo5a2-8@1	0.0289917	0.0022789	1.002	0.682362	0.783109	0.50965	0.200299	0.0917759	0.666107	0.370915	0.299777	0.142875	3.67975	1.95951	6.63953	3.00898	1.4945	0.704816	3.36151	1.44684	0.575968	0.220243	4.48596	1.50973	0.550516	0.186638		0.122328	1.63458	0	0.438292	4.50072	5.32464	18.4912	26.99	27.3718	21.0094	23.3185	27.8631	22.3787
eclo5a2-11@1	0.0260347	0.000591027	29.0533	0.368595	6.0074	0.0776643	30.7162	0.482246	96.1225	1.34495	32.0539	0.387263	300.604	5.00387	652.769	7.30456	157.878	1.41125	464.527	7.80133	110.964	2.20425	1020.08	16.5861	94.1068	1.46903		0.109851	47.3953	1.4428e-06	67.2127	649.476	569.341	1510.57	2653.53	2891.53	2903.3	4492.47	6335.89	3825.48
eclo5a2-6@1	0.0338673	0.00313659	1.463	0.72346	1.12178	0.55128	0.496132	0.182818	0.991116	0.357984	0.619751	0.173065	5.95792	1.67212	8.63719	1.6488	2.00457	0.314955	5.0616	0.837591	1.06341	0.145681	7.48507	0.746788	1.04157	0.141257		0.1429	2.38662	4.80597e-07	1.08563	6.69673	11.008	29.9393	35.1105	36.7137	31.635	43.0532	46.4911	42.3404
eclo5a2-6@2	0.0228058	0.00120991	3.99912	0.230268	0.0950097	0.00720824	0.38561	0.0232527	2.03205	0.165754	1.94565	0.0917157	19.4621	0.372	128.709	2.12794	53.8824	0.451043	234.061	2.78534	74.1265	0.48377	908.528	10.0605	133.391	1.5514		0.0962271	6.52385	0	0.843786	13.7301	34.5586	97.7994	523.206	986.857	1462.88	3001.07	5643.03	5422.41
eclo5a2-6@3	0.100065	0.00221561	8.87245	2.32298	6.52272	1.57059	1.74382	0.31767	3.72608	0.538793	2.36216	0.207316	19.5566	2.29856	22.9986	2.11507	6.15821	0.542277	23.075	1.91548	6.96104	0.576287	86.6411	6.26744	14.2541	1.17516		0.422217	14.4738	0	3.81581	25.1762	41.9567	98.2745	93.4901	112.788	144.219	281.823	538.143	579.435
eclo5a2-9@1	0.0394937	0.000832682	7.75387	1.32462	0.650406	0.139601	1.54336	0.212543	3.77407	0.701977	1.96013	0.299997	10.668	0.894899	38.8881	5.02042	14.8006	1.96698	65.9921	8.61201	24.3459	3.4427	331.504	50.9665	42.2478	5.31099		0.16664	12.649	0	3.37716	25.5005	34.8158	53.6078	158.082	271.074	412.451	985.665	2059.03	1717.39
eclo5a2-9@2	0.0423914	0.0042053	2.15539	0.688153	0.655444	0.375272	0.207273	0.0596521	0.747981	0.100695	0.870587	0.0661951	5.09164	0.707349	17.4318	2.20449	5.85845	0.833855	23.3126	3.57726	7.69037	1.23804	96.642	15.408	13.3434	2.29511		0.178866	3.51613	0	0.45355	5.05393	15.4634	25.5861	70.861	107.298	145.704	311.351	600.261	542.413
eclo5a2-19@1	0.0597767	0.00812263	11.6108	3.10755	8.90269	2.33151	1.80766	0.337988	3.82309	0.848426	1.59525	0.26947	20.0599	2.94123	32.4259	4.44512	7.02312	0.850664	17.9411	2.24211	3.02912	0.330317	21.4851	2.18583	2.41332	0.246186		0.252222	18.941	56.5129	3.95549	25.8317	28.3349	100.804	131.813	128.629	112.132	122.636	133.448	98.1023
eclo5a2-1@1	0.0234025	0.00176629	1.1062	0.534301	0.222618	0.0444605	0.737872	0.193066	2.18826	0.753564	1.39164	0.155049	15.2036	5.41051	64.5736	26.7556	25.0637	10.6329	104.25	44.9454	27.3034	11.6552	274.04	115.886	38.0715	15.557		0.0987447	1.80457	1.06624	1.6146	14.7856	24.7183	76.3999	262.494	459.042	651.563	1105.4	1702.11	1547.62
eclo5a2-1@2	0.0285939	0.00190025	21.5448	0.22579	1.49014	0.0563244	7.78231	0.191011	28.4416	0.732873	7.65173	0.192418	150.51	4.20766	676.781	19.3182	254.694	7.98911	999.694	27.193	251.142	9.44392	2419.73	98.9604	286.772	14.0249		0.120649	35.1465	3.67839	17.0291	192.173	135.91	756.33	2751.14	4664.72	6248.09	10167.7	15029.4	11657.4
eclo5a2-1@3	0.027078	0.00181504	17.4921	0.529713	1.01915	0.0660826	5.17926	0.312013	24.7281	1.17957	5.90562	0.226984	129.84	3.022	575.652	17.4019	216.793	7.82858	811.64	35.291	207.805	9.31324	1972.54	108.261	218.164	10.5212		0.114253	28.5353	7.79049	11.3332	167.081	104.895	652.464	2340.05	3970.57	5072.75	8413.17	12251.8	8868.45
eclo5a2-3@2	0.0328557	0.00150433	0.127811	0.00669797	0.0376434	0.00718651	0.0538222	0.00243102	0.0845836	0.00833179	0.0948175	0.00128695	0.906191	0.037223	2.68221	0.0407666	0.628335	0.0144794	1.55391	0.0596951	0.311224	0.00430769	2.58034	0.121189	0.268698	0.00780823		0.138632	0.208501	18.9121	0.117773	0.571511	1.68415	4.55372	10.9033	11.508	9.71191	12.6001	16.0269	10.9227
eclo5a2-3@3	0.0311537	0.00200257	6.27847	0.439464	0.0707401	0.00591491	0.350973	0.0562287	1.72092	0.109447	0.786461	0.0592495	12.7506	1.18284	74.6834	4.36592	32.5951	1.7202	139.79	6.64845	39.6007	1.70726	409.479	15.5921	50.4505	2.21026		0.13145	10.2422	4.26887	0.767993	11.6278	13.9691	64.0733	303.591	596.98	873.689	1603.27	2543.35	2050.83
eclo5a2-3@4	0.0283962	0.00175856	1.38273	0.0568646	0.0514804	0.00705282	0.125258	0.00967755	0.83571	0.0312884	0.626318	0.0414563	5.28963	0.215998	23.0389	1.58433	9.56144	0.699881	40.5549	3.33981	12.197	0.903474	135.383	11.1753	17.9437	1.41815		0.119815	2.25568	5.5094	0.274086	5.64669	11.1246	26.5811	93.654	175.118	253.468	493.806	840.89	729.417
eclo5a2-3@5	0.0322514	0.000572661	0.198845	0.0147296	0.0249387	0.00220523	0.0496027	0.00858077	0.381252	0.0177648	0.372692	0.0127799	2.13343	0.141319	2.37369	0.0695717	0.582815	0.0344436	1.55695	0.0640064	0.334902	0.0159508	3.59142	0.252586	0.4494	0.0440407		0.136082	0.324379	5.47607	0.10854	2.57603	6.61975	10.7207	9.64916	10.6743	9.73096	13.5588	22.307	18.2683
eclo5a2-15@1	0.0469739	0.00616544	12.1139	2.05263	1.62839	0.543641	3.39529	0.939757	11.4114	3.04721	3.6176	0.6321	50.0575	10.4249	225.309	53.7263	84.4008	20.4686	330.863	79.6628	95.3924	23.7941	1000.52	260.373	108.475	26.6393		0.198202	19.7616	12.9983	7.42952	77.104	64.2558	251.545	915.891	1545.8	2067.89	3862.04	6214.4	4409.56
eclo5a2-3@1	0.085216	0.00393806	16.2064	2.34906	11.7495	1.51809	1.99747	0.166678	1.1898	0.132191	0.947998	0.107025	4.66132	0.611126	8.15265	0.466291	1.97766	0.114455	5.45685	0.252989	1.09092	0.06302	8.31613	0.165063	1.05226	0.0518835		0.359561	26.4378	5.70759	4.37082	8.03918	16.8383	23.4237	33.1408	36.2208	34.1053	44.1666	51.653	42.7749
eclo5a2-17@2	0.126917	0.0163487	2.22163	0.345246	0.0252471	0.0105077	10.2732	1.47569	1.70759	0.260686	6.35576	0.954399	7.98371	0.904943	43.6431	4.4979	19.2997	2.27256	104.744	12.5419	31.2378	3.53122	410.78	49.5882	62.9582	8.13729		0.535513	3.62419	11.5088	22.4797	11.5378	112.891	40.1191	177.411	353.474	654.651	1264.69	2551.43	2559.28
eclo5a2-17@1	0.0820372	0.00310663	4.38487	0.258078	0.0741084	0.00471657	11.8073	1.64374	3.39974	0.245461	6.91288	0.40041	27.782	2.58948	176.763	15.941	64.0407	5.93408	285.758	26.7427	83.8691	8.20795	1015.68	104.318	131.224	13.249		0.346149	7.15313	69.2723	25.8365	22.9712	122.786	139.608	718.549	1172.91	1785.99	3395.51	6308.56	5334.32
eclo5a2-14@1	0.0454106	0.00394536	1.32802	0.0501049	0.00870756	0.00308151	0.823304	0.019244	0.817621	0.0397796	0.521995	0.0116247	5.05204	0.176182	18.8789	0.592304	7.0481	0.183541	29.7884	1.03102	8.38736	0.247337	93.4383	2.92587	13.2984	0.378946		0.191606	2.16643	50.0165	1.80154	5.52447	9.27167	25.3872	76.7437	129.086	186.178	339.569	580.362	540.586
eclo5a2-14@2	0.0313665	0.00112188	1.13549	0.0200951	0.00366847	0.00143883	0.434764	0.0341962	0.883098	0.0506854	0.490161	0.0210534	6.4182	0.715984	36.1029	3.0618	14.8685	1.41223	69.6119	6.24928	20.1615	1.77926	237.902	16.0687	34.0358	2.6499		0.132348	1.85235	45.0549	0.951343	5.96688	8.70624	32.2523	146.76	272.316	435.074	816.256	1477.65	1383.57
eclo5a2-16@1	0.0254088	0.00312354	2.03118	0.0345755	0.00196801	0.000665917	1.64946	0.101289	4.1162	0.1216	2.90599	0.0603022	41.2572	1.22564	212.675	5.66734	80.7637	2.58139	338.989	12.4262	84.5564	3.26262	863.079	33.583	119.132	5.9115		0.10721	3.31351	0.105548	3.60932	27.8121	51.6162	207.322	864.533	1479.19	2118.68	3423.34	5360.74	4842.76
eclo5a2-16@2	0.0298908	0.00203382	1.11188	0.0673335	0.0174689	0.0108509	0.563697	0.0382236	1.18724	0.0609879	0.908446	0.090556	10.8683	1.06625	62.8209	6.30137	25.3387	2.21676	115.643	10.4905	31.3489	2.46346	340.124	22.7546	50.0775	4.11924		0.126122	1.81383	11.3037	1.23347	8.02188	16.1358	54.6146	255.37	464.078	722.767	1269.18	2112.57	2035.67
eclo5a2-4@1	0.0466846	0.00457253	2.65289	0.67452	0.0387466	0.0165366	1.99187	0.472358	2.19695	0.276358	1.76934	0.334604	20.069	3.73499	80.0331	7.54385	31.7847	2.45058	139.481	9.48677	35.6066	2.49527	364.501	23.116	53.219	4.02153		0.196982	4.32772	4.10195	4.35859	14.8443	31.4271	100.849	325.338	582.137	871.758	1441.56	2263.98	2163.37
eclo5a2-4@2	0.0269828	0.00101753	1.42987	0.0200698	0.00542654	0.00201518	1.41897	0.0690613	3.21716	0.0736535	2.31142	0.0289563	29.5946	0.375154	184.137	3.50219	74.2791	1.43429	320.093	6.21575	83.9742	2.04235	894.593	20.7358	112.905	3.00166		0.113852	2.33258	0.180127	3.10496	21.7375	41.0553	148.717	748.523	1360.42	2000.58	3399.77	5556.48	4589.65
eclo5a2-5@1	0.0273345	0.000951358	1.33386	0.0333574	0.00240311	8.13677e-05	1.07451	0.0513407	2.67509	0.111653	1.86126	0.0271401	19.8181	0.612576	105.589	2.55831	39.3503	1.14231	167.288	5.25614	45.0138	1.19857	480.907	16.427	57.6057	2.45902		0.115335	2.17596	139.102	2.35123	18.0749	33.0597	99.5886	429.222	720.702	1045.55	1822.42	2987	2341.69
eclo5a2-5@2	0.0231199	0.00243471	3.41824	0.395038	0.00168694	0.000959209	4.83903	0.213722	7.73258	0.344074	9.52712	0.289774	21.6795	0.947027	63.4463	2.6417	17.7987	0.722238	65.5698	2.93205	17.4148	0.854235	186.749	7.67648	21.8633	0.947745		0.0975522	5.57624	1.20726	10.5887	52.2471	169.221	108.942	257.912	325.983	409.811	705.053	1159.93	888.753
eclo4a1b-2@1	0.0640339	0.0167173	0.00944399	0.00311232	0.00669782	0.00175333	0.0184738	0.00836304	0.128674	0.047972	0.0146791	0.00251728	0.279672	0.0724407	2.37792	0.250869	1.14859	0.0720039	4.81424	0.27952	1.07393	0.0923087	10.4466	0.839936	1.38021	0.103196		0.270185	0.0154062	11.6454	0.0404241	0.869421	0.260729	1.40539	9.66636	21.0365	30.089	43.4791	64.8857	56.1061
eclo4a1b-4@1	0.332909	0.0720311	61.4387	13.3573	1.33133	0.211157	23.1026	2.73495	3.35654	0.470781	2.36019	0.483668	30.0228	7.12115	114.054	24.9829	21.6708	4.76178	42.737	8.90559	5.94976	1.34145	37.3471	7.93797	4.72308	1.10695		1.40468	100.226	41.2725	50.5528	22.6793	41.9216	150.869	463.634	396.902	267.106	240.881	231.97	191.995
eclo4a1b-3@1	0.0501444	0.00474079	0.421801	0.126858	0.00843074	0.00353625	0.160296	0.0622353	0.151745	0.0479562	0.0571961	0.00923787	0.323415	0.0490766	2.1395	0.255252	0.790693	0.112219	3.47495	0.372643	0.844092	0.0952499	8.34047	0.991438	1.02401	0.140272		0.21158	0.688093	1.53352	0.350757	1.0253	1.01592	1.6252	8.69714	14.4816	21.7184	34.1738	51.8042	41.6263
5a3C-11@3	0.0700983	0.011042	0.69131	0.0556874	0.00955446	0.0057061	1.60643	0.598394	0.879411	0.139917	1.86211	0.289878	4.58526	0.469224	20.1362	2.05432	7.6369	0.830142	35.9806	3.53707	9.73048	1.09721	110.94	13.1036	17.5457	2.34654		0.295774	1.12775	7.92724	3.51516	5.94196	33.0748	23.0415	81.8543	139.87	224.879	393.946	689.067	713.238
5a3C-11@1	0.0277202	0.00599303	1.33186	0.279709	0.00575121	0.0027209	0.755828	0.127281	1.03542	0.089501	0.983992	0.0492722	9.04627	1.15674	45.4626	5.79079	17.5656	2.18055	76.3878	10.3296	20.1269	2.57116	217.729	26.7321	33.2962	5.53268		0.116963	2.1727	14.6732	1.65389	6.99608	17.4777	45.4587	184.807	321.715	477.424	814.854	1352.36	1353.5
5a3C-11@1	0.0277202	0.00599303	1.33186	0.279709	0.00575121	0.0027209	0.755828	0.127281	1.03542	0.089501	0.983992	0.0492722	9.04627	1.15674	45.4626	5.79079	17.5656	2.18055	76.3878	10.3296	20.1269	2.57116	217.729	26.7321	33.2962	5.53268		0.116963	2.1727	16.3147	1.65389	6.99608	17.4777	45.4587	184.807	321.715	477.424	814.854	1352.36	1353.5
5a3C-11@2	0.0152876	0.00177811	0.374037	0.0600417	0	0	0.32256	0.0752671	0.304237	0.0272564	1.87714	0.327763	3.18295	0.326701	9.17672	1.10361	3.31107	0.391711	16.5202	2.08349	3.95749	0.469186	41.0239	5.19933	9.54979	1.25978		0.0645045	0.610175	19.5316	0.70582	2.05565	33.3418	15.9947	37.3037	60.6422	103.251	160.222	254.807	388.203
5a3C-10@1	0.0316993	0.000694526	3.22061	0.307162	0.00268918	0.000390301	0.897794	0.0673271	2.56241	0.250658	2.02032	0.113266	19.9596	3.27103	95.2108	20.7863	39.3852	8.49895	174.377	37.8507	46.0348	9.80523	513.063	108.464	70.174	14.3807		0.133752	5.25384	9.06745	1.96454	17.3136	35.8849	100.3	387.036	721.341	1089.85	1863.76	3186.72	2852.6
5a3C-12@1	0.0099465	0.00141622	1.09798	0.156673	0.00368137	0.00346345	0.318108	0.0370399	0.849452	0.0381381	2.16771	0.138711	7.3257	0.883842	41.6022	8.18679	20.0771	3.94108	121.581	21.2176	40.4172	6.39556	537.13	74.4295	111.005	13.5129		0.0419683	1.79115	6.62368	0.696078	5.73954	38.5028	36.8126	169.115	367.712	759.884	1636.32	3336.21	4512.41
5a3C-12@2	0.00484861	0.000575981	3.25385	0.334494	0.00105885	0.000995821	0.295275	0.0586592	0.936274	0.0652969	1.54251	0.209542	11.8318	1.16912	99.369	11.2911	49.8536	5.43676	286.76	30.5908	84.9792	9.13058	968.755	98.2876	213.939	19.5264		0.0204583	5.30807	6.83956	0.646117	6.32618	27.3981	59.4565	403.939	913.069	1792.25	3440.45	6017.11	8696.69
5a3C-12@3	0.00632318	0.000730319	7.37111	0.696863	0.000810015	0.000759513	0.730359	0.0889254	1.74761	0.0905446	2.50161	0.113797	27.0419	0.846706	236.29	9.47844	107.934	4.59812	557.601	22.3412	153.858	5.53027	1646.07	56.0428	320.147	13.4353		0.0266801	12.0247	0.649521	1.59816	11.8082	44.4336	135.889	960.527	1976.81	3485.01	6229.08	10224	13014.1
5a3C-15@1	0.0225361	0.00210417	0.255031	0.00913227	0.00088308	0.000479949	0.0989044	0.0281705	0.463668	0.0526872	1.178	0.113238	5.71338	0.26858	19.7027	0.90166	6.13628	0.356791	23.529	1.90789	5.70194	0.61286	60.639	8.17743	10.4207	1.65655		0.0950888	0.416038	64.6827	0.216421	3.13289	20.9237	28.7104	80.0924	112.386	147.056	230.848	376.64	423.604
eclo5a3D-2@1	0.0362053	0.000174824	0.388867	0.0376258	0.0125023	0.00308367	0.110627	0.00707608	0.281626	0.0198695	0.32037	0.0431429	1.67666	0.102519	12.6637	0.972302	5.98519	0.539414	34.0966	3.3718	12.7885	1.53348	180.234	22.2132	27.3016	3.5098		0.152765	0.634367	0.660867	0.242072	1.90288	5.69041	8.42543	51.4786	109.619	213.103	517.752	1119.47	1109.82
eclo5a3D-2@2	0.030876	0.00112043	0.100321	0.00565147	0.00508706	0.00177514	0.0932877	0.00681091	0.159513	0.00830922	0.153093	0.0146323	1.27754	0.0761807	3.51149	0.264978	0.790127	0.0495423	2.15214	0.126763	0.403731	0.0304881	3.47966	0.157821	0.409124	0.0360705		0.130278	0.163655	5.31881	0.204131	1.07779	2.71924	6.4198	14.2744	14.4712	13.4509	16.3454	21.6128	16.6311
eclo5a3D-2@4	0.0296026	0.00155417	1.02915	0.127743	0.014115	0.00250065	0.258855	0.0467066	0.601404	0.0819975	0.70387	0.0748732	3.96619	0.245059	28.3502	3.02671	13.557	1.49787	75.5537	8.46497	26.8705	3.1058	393.64	47.6201	63.0685	7.18014		0.124906	1.67887	14.9928	0.566422	4.06354	12.5021	19.9306	115.245	248.297	472.21	1087.87	2444.97	2563.76
eclo5a3D-8@1	0.0330655	0.00253801	0.469507	0.0372808	0.00670266	0.00175419	0.338515	0.0584756	0.185896	0.00640874	0.191663	0.0169978	1.3761	0.181222	3.86233	0.442347	0.938015	0.114701	2.89129	0.338579	0.662348	0.0784189	7.61548	1.01409	1.0177	0.163469		0.139517	0.765916	14.9928	0.740734	1.25606	3.40432	6.91507	15.7005	17.1798	18.0706	26.8157	47.3011	41.3698
eclo5a3D-8@2	0.0288753	0.0016711	0.856017	0.126698	0.00612266	0.000948425	1.05226	0.243218	2.49499	0.337422	4.25942	0.435922	17.7401	1.14863	81.9731	5.98505	33.4249	2.30559	170.172	11.3885	54.0544	3.54336	702.07	44.3918	104.235	5.31617		0.121837	1.39644	2.85734	2.30254	16.858	75.6557	89.1463	333.224	612.177	1063.58	2188.44	4360.68	4237.2
eclo5a3D-6@1	0.0310422	0.002817	0.499294	0.0586992	0.00802832	0.00172077	0.560356	0.0533094	0.311921	0.027912	0.317967	0.0328547	1.92122	0.132957	2.08692	0.0461651	0.34582	0.011468	0.728737	0.0475542	0.116486	0.00418291	1.12097	0.0701538	0.1549	0.0176098		0.13098	0.814509	53.8174	1.22616	2.10758	5.64773	9.65435	8.48342	6.3337	4.55461	4.71601	6.96255	6.29676
eclo5a3D-6@2	0.0334399	0.00378267	2.06865	0.0344717	0.00819897	0.00368553	1.96087	0.246227	3.85593	0.161563	2.29669	0.0394249	16.2665	0.735522	67.0814	6.54232	26.3934	2.65734	121.332	11.8502	33.1445	3.1399	367.739	35.5466	52.4511	4.16884		0.141097	3.37463	21.1962	4.29075	26.0536	40.7938	81.7412	272.689	483.396	758.323	1341.88	2284.09	2132.16
eclo5a3D-14@1	0.0357283	0.00147529	1.70656	0.203692	0.0109549	0.00175831	0.582914	0.0648285	1.3397	0.130339	0.812386	0.0675364	6.79352	0.488739	41.0774	3.87812	17.3722	1.70266	83.0925	7.42728	24.2654	2.37591	289.171	28.1042	38.3206	3.35158		0.150752	2.78395	29.2337	1.27552	9.05202	14.4296	34.1383	166.981	318.172	519.328	982.406	1796.09	1557.75
eclo5a3D-5@1	0.0338601	0.00208989	0.132985	0.00539534	0.00256338	0.00105013	0.0540736	0.00869375	0.299024	0.0142537	0.344974	0.0118971	2.69904	0.0617889	8.04135	0.159479	1.7714	0.0300388	4.66895	0.0368262	0.876145	0.0232908	7.0878	0.134597	0.675256	0.0214944		0.14287	0.216941	24.5404	0.118323	2.02043	6.12742	13.563	32.6884	32.4432	29.1809	35.4715	44.0236	27.4494
eclo5a3D-5@2	0.0307796	0.00118775	0.107464	0.00500583	0.00311901	0.000955069	0.0599823	0.0119964	0.139682	0.00124413	0.14038	0.00567264	1.0972	0.0206423	3.11502	0.0905453	0.696284	0.0304179	1.91519	0.0295096	0.376627	0.0190175	3.00596	0.0949266	0.313768	0.0166497		0.129872	0.175308	2.33447	0.131252	0.943798	2.49343	5.51356	12.6627	12.7524	11.9699	15.2481	18.6706	12.7548
eclo5a3D-8@1	0.0330655	0.00253801	0.469507	0.0372808	0.00670266	0.00175419	0.338515	0.0584756	0.185896	0.00640874	0.191663	0.0169978	1.3761	0.181222	3.86233	0.442347	0.938015	0.114701	2.89129	0.338579	0.662348	0.0784189	7.61548	1.01409	1.0177	0.163469		0.139517	0.765916	0.686049	0.740734	1.25606	3.40432	6.91507	15.7005	17.1798	18.0706	26.8157	47.3011	41.3698
eclo5a3D-8@2	0.0288753	0.0016711	0.856017	0.126698	0.00612266	0.000948425	1.05226	0.243218	2.49499	0.337422	4.25942	0.435922	17.7401	1.14863	81.9731	5.98505	33.4249	2.30559	170.172	11.3885	54.0544	3.54336	702.07	44.3918	104.235	5.31617		0.121837	1.39644	7.83639	2.30254	16.858	75.6557	89.1463	333.224	612.177	1063.58	2188.44	4360.68	4237.2
eclo5a3D-14@1	0.0357283	0.00147529	1.70656	0.203692	0.0109549	0.00175831	0.582914	0.0648285	1.3397	0.130339	0.812386	0.0675364	6.79352	0.488739	41.0774	3.87812	17.3722	1.70266	83.0925	7.42728	24.2654	2.37591	289.171	28.1042	38.3206	3.35158		0.150752	2.78395	1.14527	1.27552	9.05202	14.4296	34.1383	166.981	318.172	519.328	982.406	1796.09	1557.75
eclo5a3D-5@1	0.0338601	0.00208989	0.132985	0.00539534	0.00256338	0.00105013	0.0540736	0.00869375	0.299024	0.0142537	0.344974	0.0118971	2.69904	0.0617889	8.04135	0.159479	1.7714	0.0300388	4.66895	0.0368262	0.876145	0.0232908	7.0878	0.134597	0.675256	0.0214944		0.14287	0.216941	15.4958	0.118323	2.02043	6.12742	13.563	32.6884	32.4432	29.1809	35.4715	44.0236	27.4494
eclo5a3D-5@2	0.0307796	0.00118775	0.107464	0.00500583	0.00311901	0.000955069	0.0599823	0.0119964	0.139682	0.00124413	0.14038	0.00567264	1.0972	0.0206423	3.11502	0.0905453	0.696284	0.0304179	1.91519	0.0295096	0.376627	0.0190175	3.00596	0.0949266	0.313768	0.0166497		0.129872	0.175308	0.119525	0.131252	0.943798	2.49343	5.51356	12.6627	12.7524	11.9699	15.2481	18.6706	12.7548
4a1A-6@1	0.0325558	0.00310937	1.68565	0.312768	0.014354	0.00499602	5.77852	1.67906	0.0787158	0.0130643	0.0281786	0.00874529	0.272754	0.0517038	2.83524	0.437386	1.39227	0.117212	7.14306	0.569583	1.91386	0.0784831	20.9583	1.53385	3.05253	0.112069		0.137366	2.74984	16.9386	12.6445	0.531863	0.500508	1.37062	11.5254	25.4994	44.6441	77.4842	130.176	124.086
4a1A-1@4	0.0054627	0.000333221	0.0480136	0.00147261	0	0	0.0542878	0.0105391	0.342644	0.00742899	0.335283	0.0118515	4.70578	0.153822	16.3563	0.372304	3.02796	0.163905	5.67796	0.142754	0.886116	0.026908	6.09613	0.0676433	0.926328	0.030742		0.0230494	0.0783255	10.0408	0.118792	2.31516	5.95529	23.6471	66.4889	55.4571	35.4873	35.8751	37.8642	37.6556
4a1A-1@3	0.0143124	0.00142934	0.0275242	0.00333995	0	0	0.0104601	0.0034717	0.100222	0.00496704	0.110312	0.00594658	1.44739	0.054461	5.17543	0.149895	0.977225	0.0257749	2.01112	0.0989221	0.288221	0.0140365	2.17632	0.0849414	0.312274	0.00489994		0.0603899	0.0449008	0.412904	0.0228886	0.677179	1.95936	7.2733	21.0383	17.8979	12.5695	11.6689	13.5175	12.6941
4a1A-1@2	0.00896192	0.000596556	0.0416226	0.014335	0.000877849	0.000818299	0.0577411	0.0412227	0.155632	0.0230944	0.188897	0.0255555	2.27622	0.0781402	7.88394	0.193991	1.56184	0.0416763	3.5983	0.0646592	0.566389	0.0370381	4.0847	0.162936	0.662817	0.0482003		0.037814	0.0678998	0.234429	0.126348	1.05157	3.35519	11.4383	32.0485	28.6052	22.4894	22.9307	25.3708	26.9438
4a1A-1@1b	0.0223778	0.000852147	0.0265932	0.00419788	0.00126615	0.00124499	0.0101005	0.0051024	0.11562	0.0155635	0.13873	0.0196754	1.48651	0.232106	6.45882	0.91981	1.2079	0.156873	2.49979	0.248282	0.392847	0.0448912	3.39216	0.3329	0.424257	0.0518487		0.094421	0.043382	7.83639	0.0221018	0.781219	2.46412	7.46989	26.2554	22.1226	15.6237	15.9047	21.0693	17.2462
4a2-2@1	0.052867	0.0054135	5.73377	0.698257	0.0382651	0.00814275	8.01898	1.0131	0.260773	0.0185095	1.12345	0.137344	0.745101	0.031309	2.21079	0.0849854	0.616683	0.0354117	2.58074	0.0158698	0.803515	0.0111538	8.9858	0.164902	1.24024	0.051624		0.223067	9.35362	1.14527	17.547	1.76198	19.9548	3.74423	8.98694	11.2946	16.1296	32.531	55.8124	50.4163
4a2-1@1	0.0220256	0.000466121	0.083956	0.00520778	0	0	0.21286	0.0141479	0.137208	0.00816344	0.110888	0.00675347	0.791482	0.0710895	4.9077	0.223115	1.31128	0.0303845	3.41477	0.105375	0.567328	0.0211952	4.7503	0.191803	0.534883	0.0507763		0.092935	0.136959	15.4958	0.465776	0.92708	1.96959	3.9773	19.95	24.0162	21.3423	22.9688	29.505	21.7432
4a2-1@2	0.0275676	0.000882283	0.0370625	0.00591735	0.00594308	0.00239838	0.134251	0.0316338	0.0556593	0.0132735	0.0686939	0.00321882	0.583064	0.0182078	6.27131	0.268468	2.13234	0.0781075	5.13859	0.160483	0.714232	0.0229652	4.42982	0.179366	0.405838	0.021177		0.116319	0.0604609	10.0408	0.293766	0.376076	1.22014	2.92997	25.4931	39.0538	32.1162	28.9163	27.5144	16.4975
5a3A-3@1	0.00807931	0.000517526	1.37357	0.24694	0	0	0.169304	0.0289873	0.356035	0.0212362	0.14507	0.0124809	3.04013	0.241595	14.0537	1.21202	5.76464	0.625451	27.2134	3.51685	7.2102	0.993469	77.582	10.4805	14.4594	2.08872		0.0340899	2.24074	0.412904	0.370469	2.40564	2.57673	15.277	57.1287	105.579	170.084	291.911	481.876	587.781
5a3A-3@1	0.00807931	0.000517526	1.37357	0.24694	0	0	0.169304	0.0289873	0.356035	0.0212362	0.14507	0.0124809	3.04013	0.241595	14.0537	1.21202	5.76464	0.625451	27.2134	3.51685	7.2102	0.993469	77.582	10.4805	14.4594	2.08872		0.0340899	2.24074	0.234429	0.370469	2.40564	2.57673	15.277	57.1287	105.579	170.084	291.911	481.876	587.781
5a3A-3@2	0.0179386	0.000563849	1.79949	0.166483	0.00236746	0.00234976	0.939917	0.0996343	0.655588	0.0699591	0.354192	0.0271522	3.79226	0.281155	20.8729	2.24235	9.41402	1.07305	46.3974	5.42819	12.9967	1.43255	149.265	17.17	25.2361	3.02927		0.0756902	2.93555	1.13243	2.05671	4.42965	6.29115	19.0566	84.8493	172.418	289.984	526.181	927.111	1025.86
5a3A-3@3	0.0281346	0.000115661	0.0344037	0.00250587	0	0	0.0141831	0.00283127	0.104074	0.0158121	0.0911609	0.0078425	0.798867	0.0610804	2.60673	0.101552	0.54624	0.0331863	1.2889	0.122413	0.224142	0.0150132	1.97153	0.1493	0.214613	0.0255546		0.118712	0.0561235	0.963926	0.0310353	0.703201	1.6192	4.01441	10.5965	10.0044	8.0556	9.07458	12.2455	8.72409
5a3A-3@4	0.0328109	0.000358398	0.0990487	0.0105588	0.000793612	0.000448628	0.296286	0.0541373	0.291314	0.0240798	0.293452	0.01562	1.13503	0.0676365	2.61297	0.0300067	0.57212	0.026454	1.40884	0.0870532	0.256375	0.0217764	1.97634	0.0543165	0.233072	0.0123761		0.138443	0.16158	0.38809	0.648329	1.96834	5.21229	5.70365	10.6218	10.4784	8.80522	10.3796	12.2754	9.47445
5a3A-17@1	0.0920361	0.0138456	0.214609	0.0319915	0.0334721	0.0193628	80.197	17.1922	0.925481	0.111649	1.74867	0.210596	2.52556	0.175578	3.78834	0.352595	1.04964	0.140904	3.69008	0.294877	0.916427	0.0952256	10.4929	1.17747	1.64439	0.20228		0.388338	0.350097	0.502259	175.486	6.25325	31.0599	12.6913	15.3998	19.2241	23.063	37.1023	65.1735	66.8452
5a3A-17@2	0.0523625	0.00717926	3.11644	0.840953	0.0791966	0.0290528	23.8299	7.96149	2.64442	0.100042	4.44022	0.0911212	9.39066	0.942544	25.4232	1.11483	7.81642	0.23611	34.0644	1.28082	11.7232	0.463818	168.22	6.8626	21.4753	0.799751		0.220939	5.08391	2.38146	52.1442	17.8677	78.8671	47.1892	103.346	143.158	212.902	474.623	1044.84	872.979
5a3A-13@1	0.0336382	0.000155649	8.93803	0.233672	0.00405669	0.00116831	6.76468	0.074529	15.2891	0.182374	5.77025	0.102417	79.2105	0.861615	425.191	5.34605	161.281	1.7562	705.536	12.7739	200.701	3.68299	2266.24	53.0771	255.005	6.15468		0.141933	14.5808	0.220034	14.8024	103.305	102.491	398.043	1728.42	2953.87	4409.6	8125.56	14076	10366.1
5a3A-13@2	0.0291044	0.00222788	0.326869	0.109497	0.00276288	0.00120307	1.06498	0.591611	0.528264	0.127859	0.447911	0.0945483	3.76959	0.362271	9.34851	0.490763	2.1328	0.140772	5.22804	0.214967	0.933634	0.0470049	6.96718	0.181019	0.915544	0.03311		0.122803	0.533229	0.577664	2.33038	3.56935	7.95579	18.9427	38.0021	39.0622	32.6752	37.799	43.2744	37.2172
5a3A-13@3	0.0241996	0.0011199	0.0745936	0.00376518	0	0	0.0166704	0.00710262	0.0910029	0.00785937	0.0887661	0.00578664	0.701602	0.0339215	2.29082	0.0931773	0.596275	0.0500789	1.70728	0.104657	0.347585	0.0243133	3.34442	0.255741	0.396788	0.0269216		0.102108	0.121686	0.695084	0.0364778	0.614885	1.57666	3.52564	9.31227	10.9208	10.6705	14.0723	20.7728	16.1296
5a2-2@1	0.0380283	0.00285643	1.34467	0.0225402	0.130398	0.00584798	1.55791	0.0436005	2.86248	0.200061	1.5037	0.0438753	13.8969	0.549018	74.6845	2.84593	32.8373	1.0984	160.939	5.3924	44.4913	1.59753	504.654	17.4733	76.2968	2.37205		0.160457	2.19359	3.13802	3.40899	19.3411	26.7088	69.8336	303.595	601.417	1005.87	1801.27	3134.5	3101.5
5a2-2@2	0.0318211	0.00072437	1.18829	0.0491874	0.15666	0.0324168	0.892016	0.174631	2.08535	0.207417	1.62304	0.155721	13.0269	0.69296	114.454	6.50286	52.5603	2.26412	267.81	10.5643	80.3323	3.41765	975.89	40.8391	127.999	3.47351		0.134266	1.93849	3.13802	1.95189	14.0902	28.8285	65.4616	465.261	962.643	1673.81	3252.32	6061.43	5203.23
5a2-2@3	0.0293879	0.00298106	1.06935	0.012212	0.240501	0.0240209	1.06901	0.0608702	2.03491	0.0415374	0.989766	0.0148612	11.2427	0.55711	69.3778	1.81597	31.3575	0.921592	157.313	5.93509	44.3586	1.13989	527.13	6.71984	82.9274	2.59361		0.124	1.74445	5.80562	2.3392	13.7494	17.5802	56.4958	282.023	574.313	983.207	1795.89	3274.1	3371.03

## Sheet: S4 Rutile
										Calculated T (°C; Tomkins et al., 2007)
Analysis	Textural context	Cr (ppm)	det. lim.	Fe (ppm)	det. lim.	Si (ppm)	det. lim.	Zr ppm	det. lim.	P = 1.8 GPa	P = 2.0 GPa	P = 2.2 GPa	P = 2.4 GPa	P = 2.6 GPa
4a2_1	matrix	331	35	1004	60	3410	196	512	90	730.826	739.844	748.862	757.879	766.897
4a2_2	matrix	3050	36	819	62	1798	208	499	81	728.471	737.468	746.464	755.461	764.457
4a2_3	matrix	4293	36	1056	62	3054	207	605	80	746.383	755.54	764.698	773.855	783.013
4a2_5	matrix	994	34	730	61	986	205	426	82	714.227	723.096	731.965	740.833	749.702
4a2_6	matrix	1358	33	2190	61	1548	216	556	82	738.451	747.537	756.623	765.709	774.796
4a2_7	inc. grt	3234	35	792	62	586	211	445	74	718.116	727.02	735.923	744.827	753.73
4a2_8	inc. grt	3265	35	648	62	407	210	489	71	726.625	735.605	744.585	753.565	762.545
4a2_9	inc. grt	3678	33	6040	61	3514	217	1412	81	833.456	843.396	853.335	863.275	873.215
4a2_10	former rim grt (now simplectite)	2394	35	1684	61	5108	201	775	89	770.374	779.747	789.12	798.493	807.866
4a2_12	inc. grt	1818	32	1784	61	507	216	494	76	727.552	736.54	745.529	754.517	763.505
4a2_13	former rim grt (now simplectite)	4167	32	5050	61	2634	222	490	80	726.811	735.793	744.775	753.756	762.738
4a2_14	inc. grt	3954	33	6774	61	4852	220	557	83	738.618	747.706	756.794	765.881	774.969
4a2_15	inc. cpx	1663	35	1755	60	6369	201	614	92	747.783	756.953	766.123	775.293	784.463
4a2_16	matrix	2235	35	659	61	690	203	735	75	765.145	774.471	783.797	793.123	802.449
4a2_19	matrix	2370	35	2134	61	3413	206	1080	85	804.352	814.03	823.708	833.386	843.065
4a2_20	inc. grt	2176	35	844	61	1052	208	480	78	724.937	733.902	742.867	751.832	760.797
4a2_21	inc. grt	2351	32	3314	61	1704	219	551	80	737.61	746.688	755.767	764.846	773.924
4a2_23	former rim grt (now simplectite)	3211	34	1845	62	1901	213	476	80	724.179	733.137	742.095	751.053	760.011
4a2_24	former rim grt (now simplectite)	3101	35	684	62	355	209	448	72	718.718	727.627	736.536	745.445	754.354
4a2_26	inc. grt	3011	33	1944	61	468	218	505	74	729.564	738.571	747.577	756.583	765.59
4a2_27	former rim grt (now simplectite)	3505	36	687	61	960	207	489	75	726.625	735.605	744.585	753.565	762.545
4a2_28	former rim grt (now simplectite)	4783	33	4636	62	2512	220	494	80	727.552	736.54	745.529	754.517	763.505
4a2_29	matrix	3412	36	897	61	2391	206	475	81	723.988	732.945	741.901	750.857	759.814
4a2_30	matrix	1640	33	4004	61	4414	215	470	87	723.031	731.979	740.927	749.874	758.822
4a2_31	matrix	2791	35	1518	61	3701	207	462	85	721.482	730.416	739.35	748.284	757.217
4a2_32	former rim grt (now simplectite)	410	33	2067	58	845	198	1856	79	864.809	875.031	885.252	895.473	905.695
4a2_33	former rim Ky (now simplectite)	1663	33	1115	61	422	211	522	75	732.605	741.638	750.672	759.706	768.74
4a2_34	former rim Ky (now simplectite)	1438	34	1092	61	2087	210	92	86	594.647	602.442	610.236	618.03	625.825
4a2_35	inc. grt	2502	32	2294	61	757	220	475	76	723.988	732.945	741.901	750.857	759.814
4a2_36	matrix	1566	35	1184	61	3379	202	557	88	738.618	747.706	756.794	765.881	774.969
4a2_37	inc. grt	1134	31	4270	61	2286	221	511	84	730.647	739.663	748.679	757.695	766.711
4a2_38	inc. grt	1460	31	4801	61	2650	223	600	83	745.598	754.748	763.899	773.049	782.2
4a2_39	inc. grt	1853	32	4224	61	2318	222	530	83	734.008	743.054	752.1	761.147	770.193
4a2_4		1408	33	16783	60	22682	211	421	88
4a2_11		4929	32	11915	62	5398	225	492	82
4a2_17		1908	29	57390	63	23017	224	245	77
4a2_18		1735	29	57031	62	26690	222	299	79
4a2_22		2627	33	19260	61	22638	213	362	85
4a2_25		1250	29	30263	62	11353	229	501	82
4a2_27		1076	30	10847	61	4098	231	478	83

## Sheet: S5 U-Pb granitic
Name	207Pb/235U		206Pb/238U		207Pb/206Pb		207Pb/206Pb		207Pb/235U		206Pb/238U		Rho
Sample	Age (Ma)	+/- 2 S.D.	Age (Ma)	+/- 2 S.D.	Age (Ma)	+/- 2 S.D.	Ratio	R.S.D.%	Ratio	R.S.D.%	Ratio	R.S.D.%	fixe alexey
53-TreglZ54	316.2	6	309.5	2	362	44	0.05383	0.0098	0.3653	0.0111	0.0492	0.0032	0.2	Conc A	Young population
54-TreglZ140	331.1	4.5	309.9	2	516	38	0.05769	0.009	0.3856	0.008	0.0493	0.0033	0.2	Conc A
54-TreglZ24	309.3	2.4	313	1.7	348	14	0.05345	0.0032	0.3561	0.0045	0.0497	0.0028	0.2	Conc A
54-TreglZ112	326.3	4.3	313.9	2	448	32	0.05592	0.0071	0.3789	0.0078	0.0499	0.0033	0.2	Conc A
54-TreglZ14	317	2.3	314.9	1.9	388	18	0.05442	0.0043	0.3665	0.0041	0.0501	0.0031	0.2	Conc A
53-TreglZ39	323.6	4.2	315.6	2.2	406	34	0.05489	0.0074	0.3753	0.0076	0.0502	0.0035	0.2	Conc A
54-TreglZ167b	327.4	4.7	316.4	2.2	416	34	0.0551	0.0077	0.3806	0.0084	0.0503	0.0035	0.2	Conc A
54-TreglZ81	325.7	4.1	316.8	2	428	34	0.05539	0.0073	0.3782	0.0074	0.0504	0.0033	0.2	Conc A
53-TreglZ36	319.7	3.9	317.6	2.6	358	28	0.05371	0.0061	0.3701	0.0071	0.0505	0.0042	0.2	Conc A
54-TreglZ110	324.6	3.5	319.4	1.7	404	26	0.0548	0.0062	0.3766	0.0064	0.0508	0.0028	0.2	Conc A
54-TreglZ126	327.2	2.9	325.4	2.4	378	20	0.0542	0.0044	0.3802	0.0051	0.0518	0.0038	0.2	Conc A
54-TreglZ129	329	6.9	328.9	3	338	48	0.05325	0.0103	0.3827	0.0122	0.0523	0.0047	0.2	Conc A
53-TreglZ63	339.5	5	341	2.5	332	32	0.0531	0.0073	0.397	0.0087	0.0543	0.0038	0.2	Conc A
53-TreglZ61	379.3	7.8	374.2	2.4	422	50	0.05525	0.0115	0.4528	0.0123	0.0598	0.0034	0.2	Conc B	Old population
54-TreglZ135	378	5	378.1	2.7	402	24	0.05478	0.0056	0.4511	0.0079	0.0604	0.0037	0.2	Conc B
54-TreglZ130	384.8	8.6	378.9	2.5	394	54	0.05456	0.0118	0.4608	0.0134	0.0605	0.0033	0.2	Conc B
53-TreglZ48	371	6.1	379.1	2.1	350	36	0.05352	0.0081	0.4411	0.0098	0.0606	0.0028	0.2	Conc B
53-TreglZ48	388.1	11.8	379.1	3	422	74	0.05525	0.0162	0.4656	0.0183	0.0606	0.0041	0.2	Conc B
54-TreglZ170	400.5	10.2	388	3.4	470	56	0.05648	0.0124	0.4836	0.0154	0.062	0.0045	0.2	Conc B
53-TreglZ62	390	8.6	391.6	3.2	392	48	0.05453	0.011	0.4683	0.0133	0.0626	0.0042	0.2	Conc B
54-TreglZ142	416.9	16.7	397.3	3.5	504	106	0.05734	0.024	0.5077	0.0245	0.0636	0.0045	0.2	Conc B
53-TreglZ44	404.6	5.4	400.1	3	452	30	0.056	0.0066	0.4896	0.008	0.064	0.0039	0.2	Conc B
54-TreglZ146	343	5.6	318.5	2.3	532	42	0.0581	0.0094	0.4019	0.0097	0.0506	0.0037	0.2
53-TreglZ56	345.6	3.8	320.9	2.3	562	34	0.05887	0.0081	0.4054	0.0064	0.051	0.0036	0.2
54-TreglZ20	347.8	6.1	321.2	2.3	550	34	0.05855	0.0079	0.4085	0.0103	0.0511	0.0037	0.2
54-TreglZ74	342	5.6	322.7	1.8	534	50	0.05816	0.0117	0.4005	0.0097	0.0513	0.0028	0.2
54-TreglZ114	347	3.8	325.3	1.7	554	32	0.05869	0.0076	0.4074	0.0065	0.0518	0.0026	0.2
53-TreglZ45	322.2	3.6	309.7	1.8	460	30	0.05624	0.007	0.3734	0.0065	0.0492	0.0029	0.2
54-TreglZ183	332.7	3.8	306.8	2.1	560	34	0.05881	0.0074	0.3877	0.0067	0.0487	0.0036	0.2
54-TreglZ69	340.3	4.1	314.3	4.4	582	64	0.05943	0.0147	0.3981	0.0071	0.05	0.0072	0.2
54-TreglZ66	330.5	2.7	314.6	2.3	482	20	0.0568	0.0045	0.3847	0.0048	0.05	0.0037	0.2
54-TreglZ85	330.2	2.7	316.1	1.6	498	18	0.05721	0.004	0.3843	0.0048	0.0503	0.0026	0.2
54-TreglZ54	366.5	7.4	310.6	1.7	782	46	0.06529	0.0109	0.4346	0.012	0.0494	0.0028	0.2
53-TreglZ06	348.5	4.7	317.1	1.9	616	30	0.06038	0.0069	0.4095	0.008	0.0504	0.0031	0.2
54-TreglZ52	347.7	5.2	318.2	1.9	604	40	0.06003	0.0093	0.4084	0.0088	0.0506	0.0031	0.2
54-TreglZ150	351.9	4.5	328.6	3	532	46	0.05807	0.0103	0.4142	0.0076	0.0523	0.0047	0.2
54-TreglZ97	363	3.9	328.9	1.7	630	24	0.06079	0.0055	0.4298	0.0063	0.0523	0.0027	0.2
54-TreglZ13	385.1	4.4	329.2	1.9	786	26	0.06536	0.006	0.4612	0.0069	0.0524	0.003	0.2
54-TreglZ180	366.9	3.8	345.3	3.5	542	22	0.05833	0.0051	0.4353	0.0062	0.055	0.0052	0.2
54-TreglZ193	410.1	8.2	377.1	3.2	610	46	0.06023	0.0108	0.4977	0.0122	0.0602	0.0044	0.2
54-TreglZ01	449.4	10.9	383	4.3	806	44	0.06601	0.0105	0.5568	0.015	0.0612	0.0058	0.2
54-TreglZ96	432.2	9.4	416.8	3	514	52	0.05762	0.0117	0.5306	0.0134	0.0668	0.0037	0.2
Plešovice zircon (337.13 ± 0.37 Ma, Sláma et al., 2008)
Name	207Pb/235U		206Pb/238U		207Pb/206Pb		207Pb/206Pb		207Pb/235U		206Pb/238U		Rho
Sample	Age (Ma)	+/- 2 S.D.	Age (Ma)	+/- 2 S.D.	Age (Ma)	+/- 2 S.D.	Ratio	R.S.D.%	Ratio	R.S.D.%	Ratio	R.S.D.%	fixe alexey
Plesovice-a11	337.9	7.4	340.2	2.2	334	56	0.05316	0.0121	0.3948	0.0129	0.0542	0.0033	0.2
Plesovice-a12	337	5	337.9	2.4	348	34	0.0535	0.0073	0.3936	0.0086	0.0538	0.0037	0.2
Plesovice-b12	336.3	5.5	339.7	2.3	298	36	0.05232	0.0077	0.3927	0.0096	0.0541	0.0035	0.2
Plesovice-c11	341.9	7.1	337.8	3.1	366	50	0.05388	0.011	0.4003	0.0123	0.0538	0.0047	0.2
Plesovice-c12	342.5	6.3	339	2	374	44	0.05409	0.0099	0.4012	0.0109	0.054	0.003	0.2
Plesovice-d11	331.8	8.4	334.7	3	328	56	0.05301	0.012	0.3866	0.0149	0.0533	0.0045	0.2
Plesovice-e11	338.3	6.3	335	2.4	398	48	0.05468	0.0106	0.3953	0.011	0.0533	0.0036	0.2
Plesovice-f11	345.6	7.7	335.6	2.4	432	52	0.05551	0.0116	0.4054	0.0131	0.0534	0.0036	0.2
Plesovice-f12	339.6	5.6	341	2.4	338	46	0.05322	0.0099	0.3972	0.0098	0.0543	0.0037	0.2
Plesovice-g11	337.4	5.3	340.2	2.1	350	44	0.05353	0.0097	0.3941	0.0092	0.0542	0.0032	0.2
Plesovice-g12	342.6	7	338.6	2.5	382	50	0.05427	0.0109	0.4013	0.0121	0.0539	0.0038	0.2
Plesovice-h11	331	6.2	341.1	1.8	302	40	0.05241	0.0088	0.3855	0.0109	0.0543	0.0027	0.2
Plesovice-h12	334.9	5.8	338.9	2.2	332	36	0.05308	0.008	0.3907	0.0101	0.054	0.0033	0.2
Plesovice-i12	334.9	6.6	339.6	2.5	320	40	0.0528	0.0088	0.3907	0.0115	0.0541	0.0038	0.2
Plesovice-j12	339	6.4	337.9	2.1	350	44	0.05354	0.0099	0.3963	0.0111	0.0538	0.0033	0.2
Plesovice-k11	337	6.2	341.4	1.8	326	40	0.05295	0.0087	0.3936	0.0109	0.0544	0.0027	0.2
Plesovice-k12	330.8	5.8	339.6	2.3	278	44	0.05185	0.0097	0.3852	0.0102	0.0541	0.0034	0.2
Plesovice-l11	338.5	6.4	338.6	2.3	342	46	0.05333	0.0101	0.3957	0.011	0.0539	0.0036	0.2
Plesovice-l12	335	6	339.1	2.2	328	44	0.05301	0.0098	0.3909	0.0105	0.054	0.0034	0.2
Plesovice-b11	347.5	5.8	340.4	2.2	396	42	0.05464	0.0093	0.4081	0.0098	0.0542	0.0034	0.2
Plesovice-d12	361.8	7.5	337.5	2.1	518	46	0.0577	0.0102	0.428	0.0123	0.0537	0.0032	0.2		Concordia Age = 337.4 ±1.8 Ma (1s, decay-const. errs included) MSWD (of concordance) = 0.12, Probability (of concordance) = 0.72
Plesovice-e12	375.1	8.6	336	2.8	648	58	0.06129	0.0134	0.4469	0.0137	0.0535	0.0043	0.2
Plesovice-i11	358.5	5.7	337.4	2.4	482	36	0.05679	0.0081	0.4235	0.0094	0.0537	0.0037	0.2
Plesovice-j11	367	8.2	340.3	2.3	540	48	0.05831	0.011	0.4354	0.0134	0.0542	0.0035	0.2
